# Supplementary material
Source: publisher figshare collection journal article supplement (https://karger.figshare.com/ndownloader/files/7442416)

Sfig. 1. Effect of AKBA on H<sub>2</sub>O<sub>2</sub> induced cell viability loss, and expression analysis of oxidative stress response genes.

AKBA caused a significant reduction in the cell viability loss induced by hydrogen peroxide (a). RT-PCR analysis showed significant increases in the expressions of Nrf2 to 3 fold, 6 h post- UVA irradiation. By contrast, expression of NQO1 appeared to be unaffected with AKBA pretreatment (b).

(a)

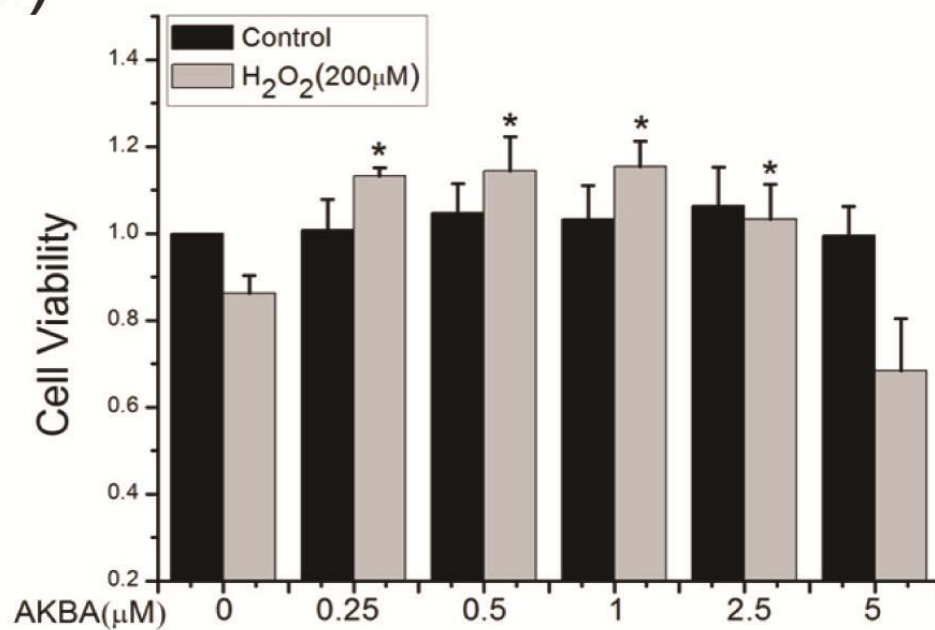

(b)

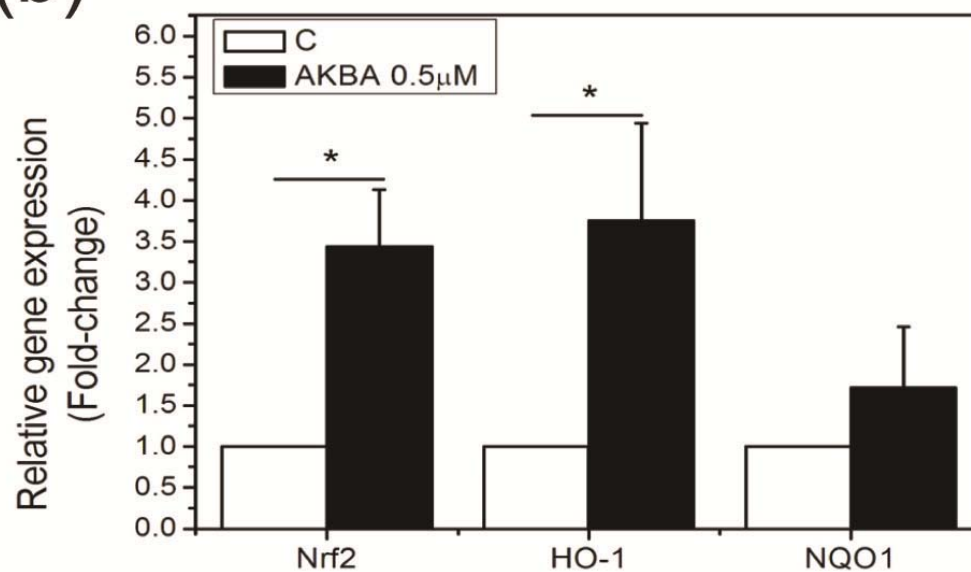

Sfig. 2. Immunofluorescence and DAPI staining for Nrf2 expression in HaCaT cells exposed to UVA or AKBA.

Immunofluorescence staining for Nrf2 (top) by anti-Nrf2 antibody in HaCaT cells and DAPI counterstaining of cell nuclei (blue). The insets show enlarged image of nuclear Nrf2 translocation. AKBA affects the expression levels of HO-1 or Nrf2 and cell viability in Bach1 siRNA silenced and Keap1-deficient cells.

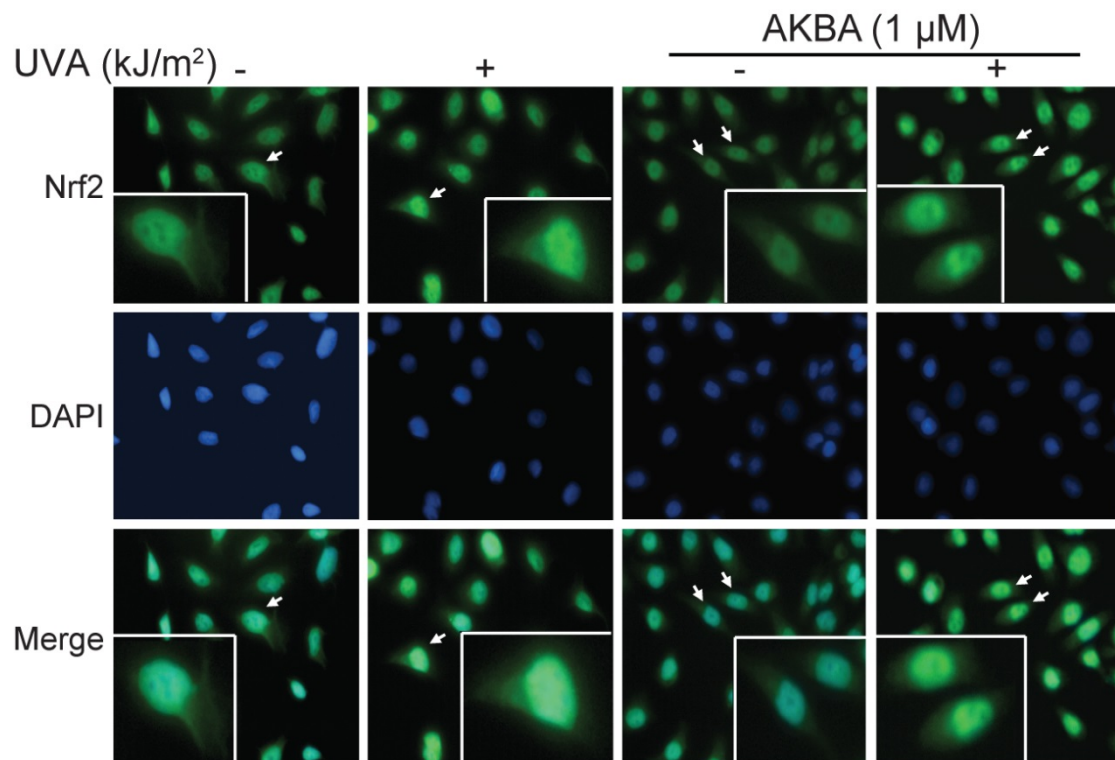

Supplement: Supplementary file 1 [file 7442416]
